# Supplementary material for: The preferences and perspectives of family caregivers towards place of care for their relatives at the end-of-life. A systematic review and thematic synthesis of the qualitative evidence
Source: PubMed Central journal article supplement — BMJ Support Palliat Care. 2015 May 19;6(4):418–29. doi: 10.1136/bmjspcare-2014-000794 (PMC5256384; doi:10.1136/bmjspcare-2014-000794), 2015-05-19
Supplement: bmjspcare-2014-000794-s1.pdf [file bmjspcare-2014-000794-s1.pdf]

| <b>Supplementary Table 1. Quality assessment using a critical appraisal checklist for qualitative studies [18]</b> |                              |                                     |                                             |                                                  |                                                 |                                                                               |                                                                                    |                                     |                             |                                                        |                    |                                                         |
|--------------------------------------------------------------------------------------------------------------------|------------------------------|-------------------------------------|---------------------------------------------|--------------------------------------------------|-------------------------------------------------|-------------------------------------------------------------------------------|------------------------------------------------------------------------------------|-------------------------------------|-----------------------------|--------------------------------------------------------|--------------------|---------------------------------------------------------|
| <b>Study</b>                                                                                                       | <b>Appraisal Criteria</b>    |                                     |                                             |                                                  |                                                 |                                                                               |                                                                                    |                                     |                             |                                                        | <b>Total 'Yes'</b> | <b>Quality:</b><br>high = ++<br>moderate = +<br>low = - |
|                                                                                                                    | Clear statement of study aim | Appropriate qualitative methodology | Appropriate research design to address aims | Appropriate recruitment strategy to address aims | Data collection method addressed research issue | Adequate consideration of relationship between the researcher and participant | Ethical issues considered                                                          | Data analysis sufficiently rigorous | Clear statement of findings | Research is valuable addition to current understanding |                    |                                                         |
| <b>Clayton et al., 2005. [21]</b>                                                                                  | Yes                          | Yes                                 | Yes                                         | Yes                                              | Yes                                             | Yes                                                                           | In part - ethical consent gained but no other discussion of ethical issues.        | Yes                                 | Yes                         | Yes                                                    | <b>10</b>          | ++                                                      |
| <b>Enyert &amp; Burman, 1999. [22]</b>                                                                             | Yes                          | Yes                                 | Yes                                         | Yes                                              | Yes                                             | Yes                                                                           | Yes                                                                                | Yes                                 | Yes                         | Yes                                                    | <b>10</b>          | ++                                                      |
| <b>Hawker et al., 2006. [23]</b>                                                                                   | Yes                          | Yes                                 | Yes                                         | Yes                                              | Yes                                             | No                                                                            | Yes – clear information on ethical approval, safe practice and supportive services | Yes                                 | Yes                         | Yes                                                    | <b>9</b>           | ++                                                      |

|                                               |     |     |                                                                              |     |     |                                                                                                                                                       |                                                                                                      |     |     |     |          |                                                          |
|-----------------------------------------------|-----|-----|------------------------------------------------------------------------------|-----|-----|-------------------------------------------------------------------------------------------------------------------------------------------------------|------------------------------------------------------------------------------------------------------|-----|-----|-----|----------|----------------------------------------------------------|
|                                               |     |     |                                                                              |     |     |                                                                                                                                                       | for participant s.                                                                                   |     |     |     |          |                                                          |
| <b>Herz, McKinnon &amp; Butow, 2006. [24]</b> | Yes | Yes | Yes                                                                          | Yes | Yes | In part – some discussion surrounding the role of the MND Association when collecting research, but no discussion around the role of the researchers. | Yes – stated that ethical approval gained and that a counsellor was present during the focus groups. | Yes | Yes | Yes | <b>9</b> | ++                                                       |
| <b>Koop &amp; Strang, 2003. [25]</b>          | Yes | Yes | Yes                                                                          | Yes | Yes | Yes                                                                                                                                                   | In part - ethical consent gained but no other discussion of ethical issues.                          | Yes | Yes | Yes | <b>9</b> | ++                                                       |
| <b>Lee, Woo &amp; Goh, 2013. [26]</b>         | Yes | Yes | Not clear – research design was highly likely to be appropriate, but was not | Yes | Yes | Not clear – some discussion surrounding data collection, but no real                                                                                  | Yes                                                                                                  | Yes | Yes | Yes | <b>8</b> | +<br><b>Some justifications and explanations lacking</b> |

|                                                  |     |     |                                                                                             |     |     |                                                                     |                                                                             |     |     |     |     |           |                                                                                                                                |
|--------------------------------------------------|-----|-----|---------------------------------------------------------------------------------------------|-----|-----|---------------------------------------------------------------------|-----------------------------------------------------------------------------|-----|-----|-----|-----|-----------|--------------------------------------------------------------------------------------------------------------------------------|
|                                                  |     |     | justified.                                                                                  |     |     | discussion surrounding potential bias and influence of researchers. |                                                                             |     |     |     |     |           |                                                                                                                                |
| <b>Linderholm &amp; Friedrichsen, 2010. [27]</b> | Yes | Yes | Yes                                                                                         | Yes | Yes | Yes                                                                 | Yes                                                                         | Yes | Yes | Yes | Yes | <b>10</b> | ++                                                                                                                             |
| <b>McGrath, 2002. [28]</b>                       | Yes | Yes | Not clear - research design was highly likely to be appropriate, but unclear justification. | Yes | Yes | No - no discussion of researchers' role.                            | Yes                                                                         | Yes | Yes | Yes | Yes | <b>8</b>  | +<br><b>Necessary components of each criteria largely present. Some areas of critical appraisal have little consideration.</b> |
| <b>Milberg et al., 2003. [29]</b>                | Yes | Yes | Yes                                                                                         | Yes | Yes | Yes                                                                 | In part - ethical consent gained but no other discussion of ethical issues. | Yes | Yes | Yes | Yes | <b>9</b>  | ++                                                                                                                             |
| <b>Mok et al., 2003. [30]</b>                    | Yes | Yes | Yes                                                                                         | Yes | Yes | Yes                                                                 | Yes                                                                         | Yes | Yes | Yes | Yes | <b>10</b> | ++                                                                                                                             |
| <b>Neergaard et</b>                              | Yes | Yes | Yes                                                                                         | Yes | Yes | Yes                                                                 | In part –                                                                   | Yes | Yes | Yes | Yes | <b>10</b> | ++                                                                                                                             |

|                                                                      |     |     |     |     |     |                                                                                                                                  |                                                                                                                   |     |     |     |           |    |
|----------------------------------------------------------------------|-----|-----|-----|-----|-----|----------------------------------------------------------------------------------------------------------------------------------|-------------------------------------------------------------------------------------------------------------------|-----|-----|-----|-----------|----|
| <b>al., 2008.<br/>[31]</b>                                           |     |     |     |     |     |                                                                                                                                  | ethical approval gained, discusses issues such as why terminally ill patients were not included within the study. |     |     |     |           |    |
| <b>O'Brien et al., 2012.<br/>[32]</b>                                | Yes | Yes | Yes | Yes | Yes | Not clear – some discussion of establishing rigour within qualitative methodology , but no real discussion of researchers' role. | Yes                                                                                                               | Yes | Yes | Yes | <b>9</b>  | ++ |
| <b>Perreault, Fothergill-Bourbonnais &amp; Fiset, 2004.<br/>[33]</b> | Yes | Yes | Yes | Yes | Yes | Yes                                                                                                                              | Yes                                                                                                               | Yes | Yes | Yes | <b>10</b> | ++ |
| <b>Stajduhar &amp; Davies, 2005.<br/>[34]</b>                        | Yes | Yes | Yes | Yes | Yes | Yes                                                                                                                              | Yes – describes obtaining both informed                                                                           | Yes | Yes | Yes | <b>10</b> | ++ |

|                                                  |                                                                                       |     |                                                                                         |     |     |                                                                                                            |                                                                               |     |     |     |          |                                                                                         |
|--------------------------------------------------|---------------------------------------------------------------------------------------|-----|-----------------------------------------------------------------------------------------|-----|-----|------------------------------------------------------------------------------------------------------------|-------------------------------------------------------------------------------|-----|-----|-----|----------|-----------------------------------------------------------------------------------------|
|                                                  |                                                                                       |     |                                                                                         |     |     |                                                                                                            | consent from participants and ethical approval.                               |     |     |     |          |                                                                                         |
| <b>Stajduhar et al., 2008. [35]</b>              | Yes                                                                                   | Yes | Yes                                                                                     | Yes | Yes | Not clear – some discussion of coding independently, but no real discussion surrounding researchers’ role. | In part – ethical approval gained, but no discussion of ethical issues.       | Yes | Yes | Yes | <b>8</b> | <b>+<br/>Some justifications and explanations lacking</b>                               |
| <b>Thomas, Morris &amp; Clarke, 2004. [36]</b>   | Not clear – within introduction, no specific aims stated, but does describe findings. | Yes | Not clear – research design was highly likely to be appropriate, but was not justified. | Yes | Yes | No                                                                                                         | Yes – ethical approval gained and discussed how informed consent was ensured. | Yes | Yes | Yes | <b>6</b> | <b>+<br/>Some criteria with vague description, appear to have little consideration.</b> |
| <b>Topf, Robinson &amp; Bottorff, 2013. [37]</b> | Yes                                                                                   | Yes | Yes                                                                                     | Yes | Yes | No                                                                                                         | Yes                                                                           | Yes | Yes | Yes | <b>9</b> | <b>++</b>                                                                               |
| <b>Wennman-Larsen &amp;</b>                      | Yes                                                                                   | Yes | Not clear – research                                                                    | Yes | Yes | No - no discussion of                                                                                      | Yes                                                                           | Yes | Yes | Yes | <b>8</b> | <b>+<br/>Some</b>                                                                       |

|                                      |  |  |                                                                   |  |  |                    |  |  |  |  |  |                                                |
|--------------------------------------|--|--|-------------------------------------------------------------------|--|--|--------------------|--|--|--|--|--|------------------------------------------------|
| <b>Tishelman,<br/>2002.<br/>[38]</b> |  |  | design was highly likely to be appropriate, but was not justified |  |  | researchers' role. |  |  |  |  |  | <b>justifications and explanations lacking</b> |
|--------------------------------------|--|--|-------------------------------------------------------------------|--|--|--------------------|--|--|--|--|--|------------------------------------------------|
